# Supplementary material
Source: publisher figshare collection journal article supplement (https://frontiersin.figshare.com/ndownloader/files/35570174)
Supplement: Supplementary file [file 35570174]

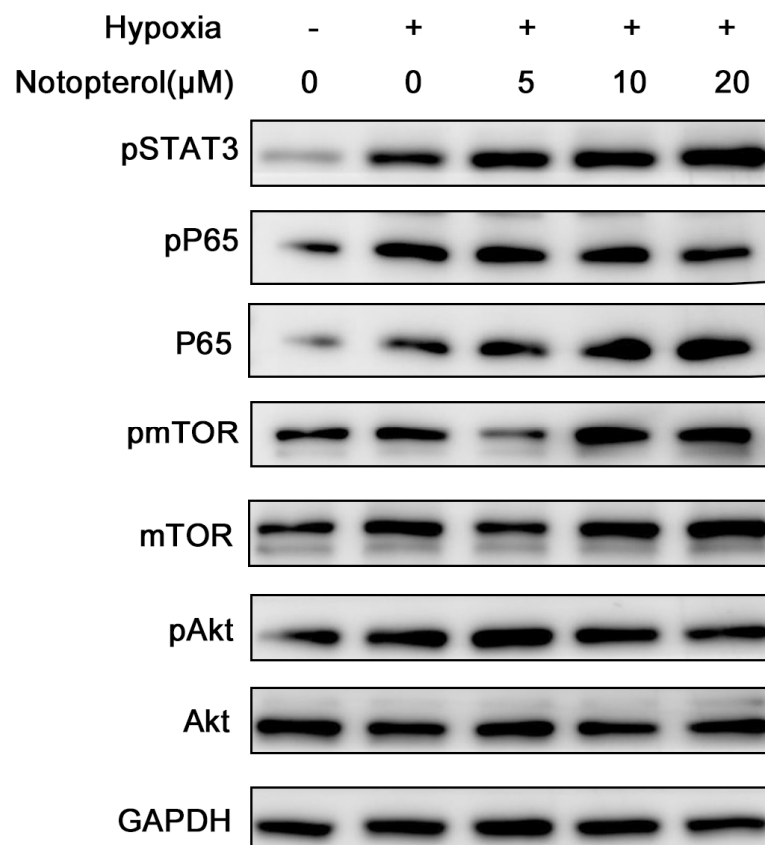

**Fig.S1 The effect of notopterol for the expression of Akt/mTOR, p-STAT3 and NF- $\kappa$ B of human pulmonary artery smooth muscle cells in response to hypoxia in vitro**
